# Supplementary material
Source: publisher figshare collection journal article supplement (https://gsajournals.figshare.com/ndownloader/files/15031277)
Supplement: Supplementary file 1 [file 15031277]

## Sheet: Sheet1
Table S3. Primers used for qPCR
Target	Primers	Reference
ACT1	GGCTTCTTTGACTACCTTCCAACA	Chavel 2010
	GATGGACCACTTTCGTCGTATTC
DAN1	CACCTGAAATTGCCAAGGCTG	This study
	CCTTCATTCGCAAGTGCTTC
SIP18	CAAGGTAACGATGATTCCCATC	This study
	CAGATTGATCATGGCCCATC
HSP33	GTGGATTTGGCTGGGATGAAC	This study
	GCTGGCGTTGACTTCATTTG
TIR1	CTGCTGCTCCAACTTCTTCTG	This study
	GGCAGCAGAAGAAGACTTAGC
GRE1	GCACTGGTGGTGGCACTTATAC	This study
	GTAGCGGTTACTTTGAGCACCTC
SNO4	CTGAGACTGGTGGATTTGGC	This study
	GTCGCTGGCGTTGACTTC
CIT2	GAAGATTCACTAGACTTGCTGGG	This study
	CATCCTTAGAACCAATCAAGTTG
CIT3	GAACAAAGGATCCCTCTTTG	This study
	CGAATAAATTCTCCCAGTCAGC
AMA1	GCGCCGAAATAAGATCAACC	This study
	GTGACTTTACTCGTTTAGCAGG
SSP2	CATATACACCAGTTGGGGC	This study
	GACGGCTGCTTCTGTTTGC
VEL1	GGGTCAATCTACGTTTGTTGG	This study
	GGTGGTGAAGATGAGTGG
ZPS1	CGCTGAAATCACCGCTTATG	This study
	GAAGCCTCCATCAATTGCTC
YAR009C	GGGCAAGGAATCCAGATTAG	This study
	GATTGGAAGTCATGGTCAGATTC
YDR210C-D	CGCAGCTATACGAATACAACC	This study
	CTGATGGAATCGTTGTCCG
FLO11	GTTCAACCAGTCCAAGCGAAA	This study
	GTAGTTACAGGTGTGGTAGGTGAAGTG
PGU1	GATGGCTTAGGTGATAGCGG	This study
	CTGAACATTTATTGATGCTGAAG
